# Supplementary material for: Spastin recovery in hereditary spastic paraplegia by preventing neddylation-dependent degradation
Source: Life Sci Alliance. 2020 Oct 26;3(12):e202000799. doi: 10.26508/lsa.202000799 (PMC7652396; doi:10.26508/lsa.202000799)
Supplement: Supplementary file 3 [file LSA-2020-00799_SdataF2.1.xlsx]

## Sheet: 2A
1	spastin	actin	relative	Fold
c-i dmso	8156.69	5808	1.40439	1
Hi dmso	2571.67	6898	0.372814	0.265463
Ci MG	8727.88	5875	1.4856	1
Hi MG	7638.93	7035	1.08585	0.730916
2	spastin	actin		Fold
c-i dmso	13867882	44657735	0.310537	1
Hi dmso	4265347	54057271	0.0789042	0.25409
Ci MG	9414690	93556366	0.100631	1
Hi MG	6708669	69473927	0.0965638	0.959581
3	spastin	actin	relative	Fold
c-i dmso	9054619	14327104	0.631992	1
Hi dmso	3561548	11909033	0.299063	0.473206
Ci MG	8042912	14194740	0.566612	1
Hi MG	4966669	11073296	0.448527	0.791594

## Sheet: 2B
1
	Ub-ladder	spastin	relative
	16382399	8871447	1.84664	1
	28008834	12754397	2.19601	1.18919
	20907926	9200619	2.27245	1.23058
	44948591	10000912	4.49445	2.43385
2
	Ub-ladder	spastin	relative
	38199291	3781447	10.1018	1
	64528647	4181326	15.4326	1.52771
	36751321	4583539	8.01811	0.793734
	79362647	3109569	25.5221	2.5265
3
	Ub-ladder	spastin	relative
	26782378	11475468	2.33388	1
	34606056	12280024	2.81808	1.20746
	50566813	13757125	3.67568	1.57492
	70202621	12667075	5.54213	2.37464

## Sheet: 2C
1
	Ub-ladder	spastin	relative
	41532512	39258602	1.05792	1
	35689491	29065631	1.22789	1.16067
	34082462	19941995	1.70908	1.61551
	49194462	21935995	2.24264	2.11985
2
	Ub-ladder	spastin	relative
	43930009	12710945	3.45608	1
	58276294	14357501	4.05894	1.17444
	89954716	21110652	4.26111	1.23293
	98924737	14000014	7.06605	2.04453
3
	Ub-ladder	spastin	relative
	16717296	12930702	1.29284	1
	32707248	16873652	1.93836	1.49931
	72188047	36565936	1.97419	1.52702
	48015905	11964477	4.01321	3.10418

## Sheet: 2D
1		Ub	1	spastin	relative	fold
UB wt	1	31556040		5864163	5.38117	1
	2	51081621		6056113	8.43472	1.56745
CRISP UB wt	3	30844467		6787163	4.54453	1
	4	61913591		6687627	9.25793	2.03716
UB Ko PX	5	20955555		6433113	3.25745	1
	6	16020735		3943648	4.06242	1.24711
UB KO CRISP	7	21295798		7125527	2.98866	1
	8	9927116		7658749	1.29618	0.433699
2			2	spastin	relative	fold
UB wt	1	80972.3		4232.58	19.1307	1
	2	197249		4376.11	45.074	2.3561
CRISP UB wt	3	33108.1		5927.28	5.58572	1
	4	69912.1		4000.58	17.4755	3.12861
UB Ko PX	5	45323.5		4743.87	9.55413	1
	6	35457.4		2990.58	11.8564	1.24097
UB KO CRISP	7	31690.1		5126.7	6.18138	1
	8	20294.5		2925.58	6.93691	1.12223
			3	spastin	relative	fold
3				17100.6	4.07524	1
UB wt	1	69689.2		16381	11.2576	2.76245
	2	184412		16812.5	3.19073	1
CRISP UB wt	3	53644.4		14716.3	10.3113	3.23165
	4	151745		21729.2	0.913785	1
UB Ko PX	5	19855.9		15547.9	1.28666	1.40805
	6	20004.8		19076.5	2.71599	1
UB KO CRISP	7	51811.5		12984.4	3.24106	1.19332
	8	42083.2

## Sheet: 2G
1		anti UB-HA	anti -flag	relative	Fold
Wt	1	108508971	12852844	8.44241	1
K554R	2	47744858	57684283	0.827693	0.0980399
2		anti UB-HA	anti -flag	relative	Fold
Wt	1	123458453	37767120	3.26894	1
K554R	2	21693454	48467291	0.44759	0.136922
3		anti UB-HA	anti -flag	relative	Fold
Wt	1	118920657	9579196	12.4145	1
K554R	2	65965637	16449442	4.01021	0.323027
4		anti UB-HA	anti -flag	relative	Fold
k554R	2	24260680	13231681	1.83353	0.30975
wt	1	74851897	12645217	5.91938	1

## Sheet: 2H
1	m1+m87	gfp	RELATIVE	fold
	25926212	15742619	1.64688	1
	17139605	15202205	1.12744	0.684593
	38175011	15660205	2.43771	1
	35940052	14257376	2.5208	1.03409
2	m1+m87	gfp	RELATIVE	fold
	52531526	9170134	5.72855	1
	39371889	13467790	2.92341	0.510324
	50157254	10108376	4.96195	1
	44431588	9737134	4.56311	0.91962
3	m1+m87	gfp	RELATIVE	fold
	14927.3	19265.4	0.774824	1
	5534.06	17841.8	0.310174	0.400315
	4957.84	14165.7	0.34999	1
	6384.79	15611.9	0.40897	1.16852
