# Supplementary material for: Spastin recovery in hereditary spastic paraplegia by preventing neddylation-dependent degradation
Source: Life Sci Alliance. 2020 Oct 26;3(12):e202000799. doi: 10.26508/lsa.202000799 (PMC7652396; doi:10.26508/lsa.202000799)
Supplement: Supplementary file 5 [file LSA-2020-00799_SdataF3.1.xlsx]

## Sheet: 3A
Hela
1		spastin	GAPDH		fold
	empty	5200.91	7257.13	0.716662	1
	HIPK2	8016.57	6872.43	1.16648	1.62766
	K228	5402.57	6304.72	0.856909	1.19569
2		spastin	GAPDH		fold
	HIPK2	8286.96	7478.69	1.10808	1.26276
	empty	6464.18	7366.57	0.877503	1
	K228	5494.31	6539.91	0.840119	0.957398
3		spastin	GAPDH		fold
	HIPK2	9694.58	11086.7	0.874436	2.03216
	k228	3958.65	8884.01	0.445592	1.03554
	empty	2358.53	5481.13	0.430299	1
NSC34
1		spastin	GAPDH		fold
	empty	3224.53	6857.37	0.470228	1
	wt	4348.43	6995.02	0.621646	1.32201
	k228	3202.38	8265.02	0.387461	0.823986
2		spastin	GAPDH		fold
	empty	8827.81	19166.4	0.460589	1
	wt	13501.1	14992	0.900552	1.95522
	k228	5939.52	15839.3	0.374986	0.814146
3		spastin	GAPDH		fold
	empty	10395	10744.9	0.967433	1
	wt	8609.01	6259.11	1.37544	1.42174
	k228	25404.7	27030.2	0.939863	0.971502

## Sheet: 3B
1	M1+M87	gfp	rel	fold
	3840.57	3073.55	1.24956	1
	3524	3314.18	1.06331	0.850949
	5099.61	2091.16	2.43865	1.95161
	8085.15	7806.55	1.03569	0.828845
	6897.49	8315.06	0.829517	0.66385
	7488.54	10068.8	0.743739	0.595203
	9524.08	9487.06	1.0039	0.803407
	9928.2	13202.7	0.751981	0.601799
	13274.2	10925.8	1.21494	0.972301
	13941.9	10137.3	1.37531	1.10064
	10515.9	12894.8	0.815517	0.652646
	13198	12929.3	1.02078	0.816916
2	15118.4	2192.48	6.89557	1
	10999.3	2521.82	4.36167	0.632531
	15176.7	1600.99	9.47957	2.17338
	16538.8	2935.77	5.63354	0.594282
	14884.5	7651.13	1.9454	0.345325
	14770.5	6607.77	2.23533	0.396789
	20806.8	9515.01	2.18673	0.97826
	16818.5	10462.8	1.60746	0.735098
	10281	11124.1	0.924215	0.574953
	11299.1	9297.43	1.2153	1.31495
	10928.1	12469.3	0.8764	0.72114
	12772.3	9992.13	1.27823	1.4585
3	6124.3	1863.28	3.28683	1
	2742.96	2043.65	1.34219	0.408354
	7192.37	1916.28	3.75329	1.14192
	12824.8	4417.65	2.90308	0.883247
	5262.35	5190.35	1.01387	0.308464
	13261.8	4253.06	3.11818	0.948689
	19648.4	4764.65	4.12379	1.25464
	12292.5	6292.48	1.95352	0.594349
	16660.2	5293.35	3.14738	0.957574
	12928.3	5095.11	2.5374	0.771989
	6672.88	6577.18	1.01455	0.308671
	10759.4	5565.06	1.93338	0.58822

## Sheet: 3C
1
		M1	M87	GAPDH	relative M1	relative M87	M1+M87	fold M1+M87
WT	0	6803.26	3443.06	13189.3	0.515818	0.261051	0.776869	1
WT	30	6498.55	2480.41	11091.7	0.585895	0.223628	0.809522	1.04203
WT	90	6581.77	2998.65	12500.9	0.526503	0.238406	0.764909	0.984606
WT	120	8008.08	3001.72	12897.6	0.620896	0.232734	0.85363	1.09881
268A	0	3390.18	2059.77	10964.1	0.309209	0.187866	0.497074	1
268A	30	2486.65	1208.06	11014.5	0.22576	0.109679	0.335439	0.674827
268A	90	1722.77	1550.43	11413.7	0.150939	0.135839	0.286779	0.576933
268A	120	1465.94	1554.94	12781.1	0.114696	0.121659	0.236355	0.475492
2		M1	M87	GAPDH		relative M87	M1+M87	fold M1+M87
WT	0	5895.11	2134.04	3000.53	1.96469	0.711222	2.67591	1
WT	30	6596.18	2998.75	3908.11	1.68782	0.767314	2.45513	0.917493
WT	90	5809.06	2943.34	4066.82	1.4284	0.723744	2.15215	0.804266
WT	120	6723.06	3801.75	4470.82	1.50376	0.850347	2.35411	0.879741
268A	0	5070.77	3572.39	4357.53	1.16368	0.819819	1.9835	1
268A	30	4195.99	3062.34	5243.11	0.800286	0.584068	1.38435	0.697935
268A	90	3679.87	3490.78	5815.82	0.632735	0.600221	1.23296	0.621606
268A	120	3133.16	2832.09	5959.41	0.525751	0.475231	1.00098	0.504654
3		M1	M87	GAPDH	relative M1	relative M87	M1+M87	fold M1+M87
WT	0	6813.81	5951	7886.18	0.864019	0.754611	1.61863	1
WT	30	9125.62	10033.8	11888.1	0.767624	0.844022	1.61165	0.995685
WT	90	7927.74	10614.4	12017.4	0.65969	0.883258	1.54295	0.953243
WT	120	8037.96	9130.45	10730.7	0.749061	0.85087	1.59993	0.988448
268A	0	5643.67	8877.03	9997.72	0.564496	0.887906	1.4524	1
268A	30	4819.01	4999.33	8996.55	0.535651	0.555694	1.09135	0.751407
268A	90	4738.18	7547.86	11095.2	0.427049	0.680283	1.10733	0.762414
268A	120	3518	5609.62	9934.08	0.354134	0.564684	0.918818	0.63262
4		M1	M87	GAPDH	relative M1	relative M87	M1+M87	fold M1+M87
WT	0	4270.26	1967.28	5752.72	0.742302	0.341975	1.08428	1
WT	30	7288.96	3541.87	8931.69	0.816079	0.396551	1.21263	1.11838
WT	90	5415.26	2487.16	6970.38	0.776896	0.356819	1.13371	1.0456
WT	120	7258.38	3800.36	8934.79	0.812372	0.425344	1.23772	1.14151
268A	0	7527.91	4233.7	8368.91	0.899509	0.505884	1.40539	1
268A	30	6132.38	3373.16	8161.67	0.751363	0.413293	1.16466	1.07413
268A	90	4905.67	3006.58	8748.5	0.560744	0.343668	0.904412	0.834116
268A	120	4346.26	2769.16	8187.62	0.530833	0.338213	0.869046	0.801498
