# Supplementary material for: Spastin recovery in hereditary spastic paraplegia by preventing neddylation-dependent degradation
Source: Life Sci Alliance. 2020 Oct 26;3(12):e202000799. doi: 10.26508/lsa.202000799 (PMC7652396; doi:10.26508/lsa.202000799)
Supplement: Supplementary file 7 [file LSA-2020-00799_SdataF4.1.xlsx]

## Sheet: 4A-B
4A-B
	1		Ub-HA-spastin	spastin	Ub-HA-spastin/spastin	Fold
CTR	WT	wt	65403.6	9031.93	7.24137	1
		A	98469.1	9274.42	10.6173	1.4662
		D	103568	14592.9	7.09714	0.980083
KO	KO	wt	66090.8	15821.7	4.17723	1
		A	50061.6	17494	2.86164	0.685057
		D	69009.8	27993.3	2.46523	0.590158
	2
CTR	WT	wt	32091.4	7305.74	4.39263	1
		A	57384.4	6080.5	9.43745	2.14847
		D	45608.7	8192.74	5.56697	1.26734
KO	KO	wt	82760.9	4000.48	20.6878	1
		A	78336.1	4855.23	16.1344	0.779899
		D	72238.3	5844.31	12.3605	0.597478
	3
CTR	WT	wt	47601.8	10418.6	4.56891	1
		A	114498	12009.6	9.53386	2.08668
		D	55777.2	13389.7	4.16568	0.911745
KO	KO	wt	111297	16500.9	6.74489	1
		A	98994.3	15032	6.58559	0.976383
		D	35403.1	13017.5	2.71965	0.403216

## Sheet: 4C
1
	m1+m87	GFP	relative	Fold
	29792957	26188785	1.13762	1
	21764421	28434078	0.765434	0.672837
	15115280	24267321	0.622866	1
	17447199	25521957	0.683615	1.09753
2
	28090351	24397593	1.15136	1
	22112481	32280442	0.685012	0.59496
	18947430	19298543	0.981806	1
	22201279	19250765	1.15327	1.17464
3
	24990551	23821714	1.04907	1
	18034217	23495765	0.767552	0.731653
	24132652	22708622	1.06271	1
	19906116	20750229	0.95932	0.902712

## Sheet: 4E
1
	cand1	spastin	relative	FOLD
ctr-cas9	18286	71181.7	0.256892	1
hipk2-cas9	5161	50592.1	0.102012	0.397101
2
	cand1	spastin	relative
ctr-cas9	25027	65194.3	0.383883	1
hipk2-cas9	5581	89219.7	0.0625535	0.162949
3
	cand1	spastin	relative
ctr-cas9	13577	65278.3	0.207986	1
hipk2-cas9	10248	79769	0.128471	0.617689
